# Supplementary material for: NIR luminescence thermometers based on Yb–Nd coordination compounds for the 83–393 K temperature range
Source: Royal Society of Chemistry journal article supplement (doi:10.1039/d2dt00147k), 2022-01-01
Supplement: d2dt00147k1.pdf [file d2dt00147k1.pdf]

## ELECTRONIC SUPPLEMENTARY INFORMATION

### NIR luminescence thermometers based on Yb-Nd coordination compounds in the 83-393K temperature range

*Anastasia V. Orlova<sup>a</sup>, Vladislava Yu. Kozhevnikova<sup>a</sup>, Leonid S. Lepnev<sup>b</sup>, Alexander  
S. Goloveshkin<sup>c</sup> and Valentina V. Utochnikova<sup>a</sup>*

- a. M.V. Lomonosov Moscow State University 1/3 Leninskiye Gory, Moscow, 119991, Russia*  
*b. P.N. Lebedev Physical Institute, Russian Academy of Sciences, Leninsky prosp. 53, Moscow, 119992, Russia*  
*c. A. N. Nesmeyanov Institute of Organoelement Compounds, Russian Academy of Sciences, Vavilova St. 28, 119991  
Moscow, Russian Federation*

#### Contents

|                                                                                                                            |   |
|----------------------------------------------------------------------------------------------------------------------------|---|
| Experimental Section.....                                                                                                  | 2 |
| TGA data .....                                                                                                             | 3 |
| IR-spectroscopy .....                                                                                                      | 4 |
| Triplet statement measurement.....                                                                                         | 5 |
| EDX data .....                                                                                                             | 6 |
| Cycling experiment.....                                                                                                    | 7 |
| Thermometric parameters .....                                                                                              | 8 |
| Approximation of the LIR temperature dependence for $\text{Yb}_{0.02}\text{Nd}_{0.12}\text{Gd}_{0.86}(\text{ant})_3$ ..... | 9 |

## Experimental Section

### Materials and methods

All solvents and chemicals were purchased from commercial sources.

**X-ray powder diffraction (XRD)** measurements were performed on Bruker D8 Advance Vario diffractometers ( $\lambda(\text{CuK}\alpha 1) = 1.54046 \text{ \AA}$ , Ge (111) monochromator, position-sensitive detector LynxEye,  $\theta/2\theta$  geometry, with rotation).

**Thermal analysis** was carried out on a thermoanalyzer STA 449 F1 Jupiter (NETZSCH, Germany) in the temperature range of 40–1000 °C in air, heating rate 10 °/min. The evolved gases were simultaneously monitored during the TA experiment using a coupled QMS 403 Aeolos quadrupole mass spectrometer (NETZSCH, Germany). The mass spectra were registered for the species with following  $m/z$  values: 18 (corresponding to  $\text{H}_2\text{O}$ ), 28 (corresponding to  $\text{N}_2$ ) and 44 (corresponding to  $\text{CO}_2$ ).

**Elemental analysis** was performed on a Carlo Erba Elemental Analyzer 1106.

**The IR spectra** were recorded on an Thermo Scientific™ Nicolet™ iS50 FTIR Spectrometer as powdered at ATR.

**X-ray** microanalysis was carried out on a Leo Supra 50 VP scanning electron microscope equipped with an INCA Energy + Oxford 350X-Max 80 X-ray energy dispersion spectrometer. Measurements were made for each sample both at the point and in area. **Absorption spectra** were recorded in the range 200-800 nm using Perkin-Elmer Lambda 650 spectrometers to determine the maximum absorption of the ligand, as well as to estimate the molar extinction coefficient of the ligand.

**Emission spectra and lifetimes** were measured using Edinburgh Instruments FLS980 Fluorescence Spectrometer equipped with 450 W Xenon lamp, diode laser ( $\lambda_{\text{ex}} = 365 \text{ nm}$ ) for spectra and nitrogen laser ( $\lambda_{\text{ex}} = 337 \text{ nm}$ ) for lifetimes and Hamamatsu R928P PMT detector.

**Photoluminescence quantum yield** were determined using a diode laser ( $\lambda_{\text{ex}} = 365 \text{ nm}$ ) as an excitation source with Ocean Optics Maya 2000 spectrometer upon excitation with a xenon lamp at 25 °C. According to absolute modified de Mello et al. [38] method we carried out measurements in an integration sphere and calculated it by formula (4), when (i)  $L_a$  is the integrated intensity of Rayleigh scattering band (measurement at the excitation wavelength with empty cuvette in the sphere); (ii)  $L_c$  is the same integrated intensity at the excitation wavelength when the sample is introduced into the cuvette; (iii)  $E_a$  is the integrated intensity of the entire emission spectrum of empty cuvette; (iv)  $E_c$  is the integrated intensity of the entire emission spectrum of cuvette with the sample.

$$PLQY = \frac{E_c - E_a}{L_a - L_c} \cdot 100\% \quad (4)$$

### Synthesis of Ln(ant)<sub>3</sub>

To a water solution of K(ant) (0.3 mmol, *in situ* from KOH and H(ant)), a water solution of LnCl<sub>3</sub>·6H<sub>2</sub>O (0.1 mmol; Ln = Yb<sub>x</sub>Nd<sub>y</sub>Gd<sub>1-x-y</sub>) was added, resulting in the formation of lanthanide complex precipitate. Then the mixture was boiled for a few minutes for better crystallization, precipitate was separated by centrifugation, washed by distilled water to remove dissolvable precursors and by-products, and dried in air.

Nd<sub>0.4</sub>Gd<sub>0.6</sub>(ant)<sub>3</sub>. Elemental analysis (%), calcd. for Nd<sub>0.4</sub>Gd<sub>0.6</sub>(C<sub>15</sub>H<sub>9</sub>O<sub>2</sub>)<sub>3</sub> (815.5): C, 66.22; H, 3.31. Found: C, 66.93; H, 3.34.

Yb<sub>0.2</sub>Gd<sub>0.8</sub>(ant)<sub>3</sub>. Elemental analysis (%), calcd. for Yb<sub>0.2</sub>Gd<sub>0.8</sub>(C<sub>15</sub>H<sub>9</sub>O<sub>2</sub>)<sub>3</sub> (823.9): C, 65.55; H, 3.28. Found: C, 65.02; H, 3.25.

### Synthesis of Ln(acr)<sub>3</sub>(H<sub>2</sub>O)<sub>8</sub>

To a water solution of K(acr) (0.3 mmol, *in situ* from KOH and H(acr)·H<sub>2</sub>O), a water solution of LnCl<sub>3</sub>·6H<sub>2</sub>O (0.1 mmol; Ln = Yb<sub>x</sub>Nd<sub>y</sub>Gd<sub>1-x-y</sub>) was added, resulting in the formation of lanthanide complex precipitate. Then the mixture was boiled for a few minutes for better crystallization, precipitate was separated by centrifugation, washed by distilled water to remove dissolvable precursors and by-products, and dried in air.

Yb<sub>0.2</sub>Gd<sub>0.8</sub>(acr)<sub>3</sub>(H<sub>2</sub>O)<sub>8</sub>. Elemental analysis (%), calcd. for Yb<sub>0.2</sub>Gd<sub>0.8</sub>(C<sub>14</sub>H<sub>8</sub>NO<sub>2</sub>)<sub>3</sub>(H<sub>2</sub>O)<sub>8</sub> (970.4): C, 51.94; N, 4.33; H, 4.12. Found: C, 51.77; N, 4.44; H, 4.45.

Yb<sub>0.5</sub>Gd<sub>0.5</sub>(acr)<sub>3</sub>(H<sub>2</sub>O)<sub>8</sub>. Elemental analysis (%), calcd. for Yb<sub>0.5</sub>Gd<sub>0.5</sub>(C<sub>14</sub>H<sub>8</sub>NO<sub>2</sub>)<sub>3</sub>(H<sub>2</sub>O)<sub>8</sub> (906.3): C, 55.61; N, 4.63; H, 4.41. Found: C, 55.95; N, 4.61; H, 4.52.

Nd<sub>0.3</sub>Gd<sub>0.7</sub>(acr)<sub>3</sub>(H<sub>2</sub>O)<sub>8</sub>. Elemental analysis (%), calcd. for Nd<sub>0.3</sub>Gd<sub>0.7</sub>(C<sub>14</sub>H<sub>8</sub>NO<sub>2</sub>)<sub>3</sub>(H<sub>2</sub>O)<sub>8</sub> (963.4): C, 52.32; N, 4.36; H, 4.15. Found: C, 51.85; N, 4.48; H, 4.23.

Nd(acr)<sub>3</sub>(H<sub>2</sub>O)<sub>8</sub>. Elemental analysis (%), calcd. for Nd(C<sub>14</sub>H<sub>8</sub>NO<sub>2</sub>)<sub>3</sub>(H<sub>2</sub>O)<sub>8</sub> (954.24): C, 52.82; N, 4.40; H, 4.19. Found: C, 52.22; N, 4.35; H, 4.18.

Yb<sub>0.1</sub>Nd<sub>0.1</sub>Gd<sub>0.8</sub>(acr)<sub>3</sub>(H<sub>2</sub>O)<sub>8</sub>. Elemental analysis (%), calcd. for Yb<sub>0.1</sub>Nd<sub>0.1</sub>Gd<sub>0.8</sub>(C<sub>14</sub>H<sub>8</sub>NO<sub>2</sub>)<sub>3</sub>(H<sub>2</sub>O)<sub>8</sub> (963.4): C, 52.07; N, 4.34; H, 4.13. Found: C, 52.37; N, 4.50; H, 4.16.



### TGA data

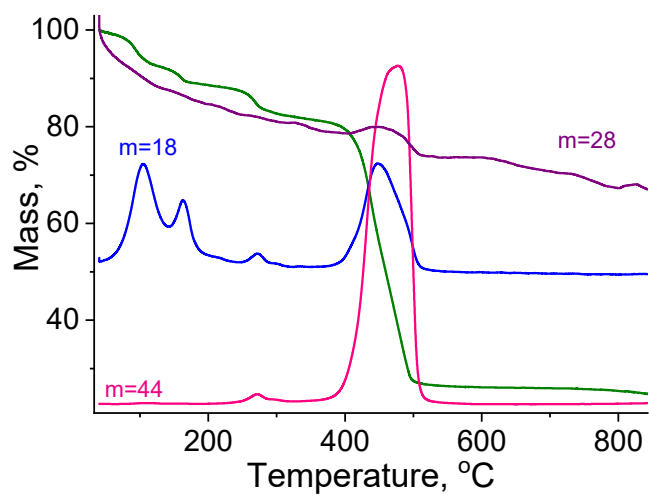

**Figure S1.** TGA-data for  $\text{Yb}_{0.4}\text{Gd}_{0.6}(\text{acr})_3(\text{H}_2\text{O})_n$

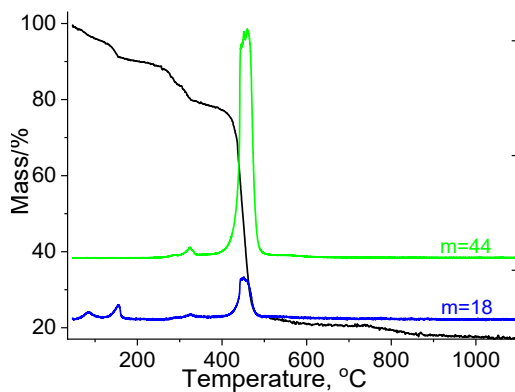

**Figure S2.** TGA-data for  $\text{Yb}_{0.05}\text{Nd}_{0.45}\text{Gd}_{0.5}(\text{acr})_3(\text{H}_2\text{O})_n$

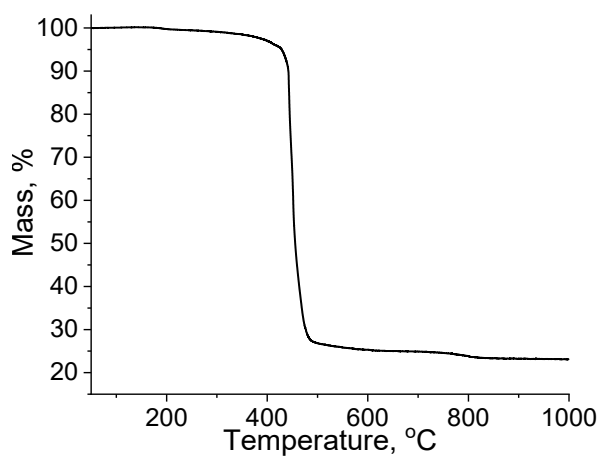

**Figure S3.** TGA-data for  $\text{Nd}_{0.12}\text{Yb}_{0.02}\text{Gd}_{0.86}(\text{ant})_3$



## IR-spectroscopy

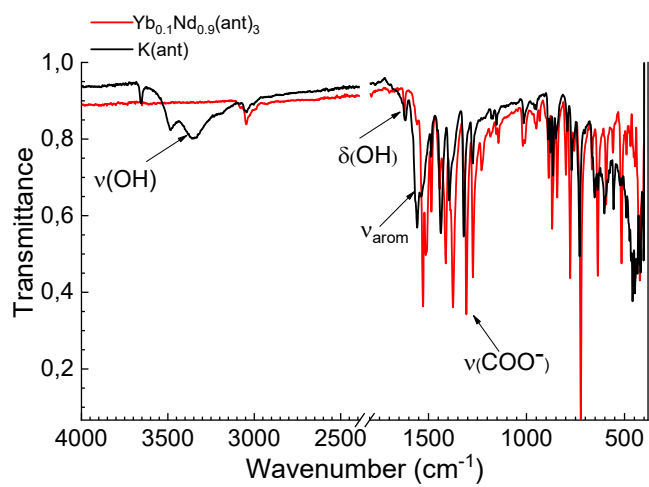

**Figure S4.** IR-spectroscopy data for Yb<sub>0.1</sub>Gd<sub>0.9</sub>(ant)<sub>3</sub>

### Triplet state measurement

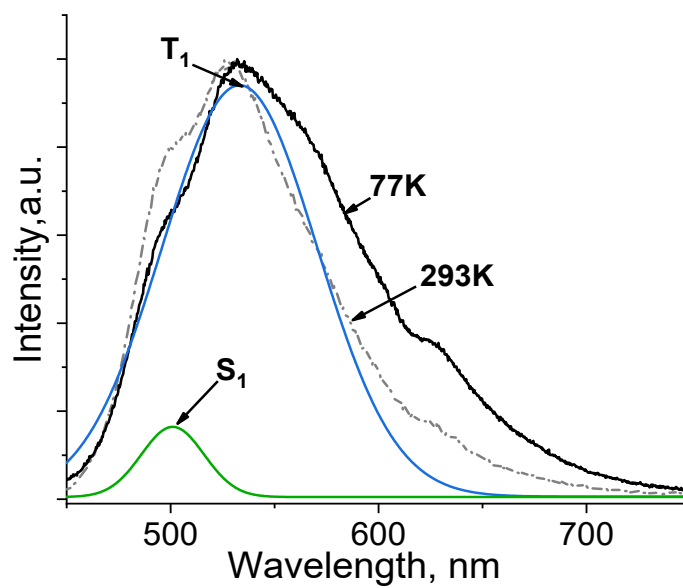

**Figure S5.** Luminescence spectra of  $Gd(acr)_3(H_2O)_n$  at 77 and 293K



## EDX data

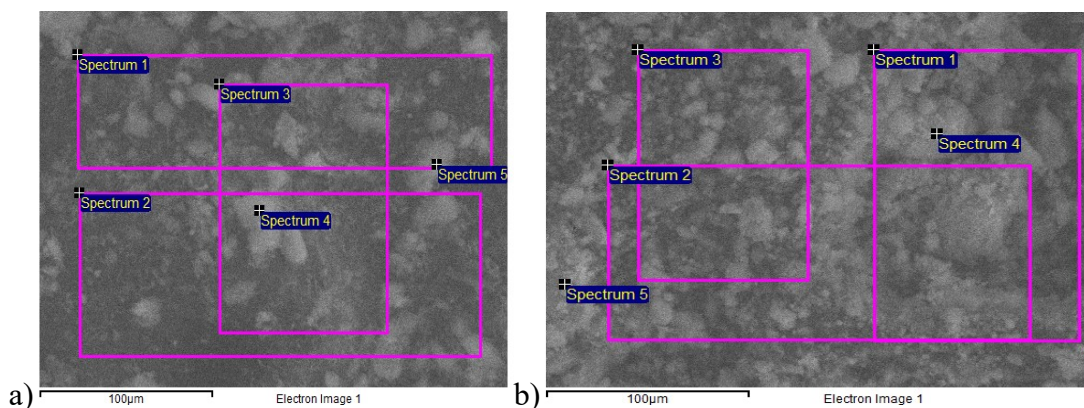

**Figure S6.** EDX element mapping for a)  $\text{Yb}_{0.02}\text{Nd}_{0.14}\text{Gd}_{0.86}(\text{ant})_3$  b)  $\text{Yb}_{0.1}\text{Nd}_{0.1}\text{Gd}_{0.8}(\text{acr})_3(\text{H}_2\text{O})_n$

**Table S1.** EDX data

| Sample                                                                              | Theoretical Yb fraction, % | Theoretical Nd fraction, % | Obtained Yb fraction, % | Obtained Nd fraction, % |
|-------------------------------------------------------------------------------------|----------------------------|----------------------------|-------------------------|-------------------------|
| $\text{Yb}_{0.1}\text{Gd}_{0.9}(\text{ant})_3$                                      | 10                         | -                          | $10\pm 1$               | -                       |
| $\text{Yb}_{0.2}\text{Gd}_{0.8}(\text{ant})_3$                                      | 20                         | -                          | $21\pm 1$               | -                       |
| $\text{Yb}_{0.3}\text{Gd}_{0.7}(\text{ant})_3$                                      | 30                         | -                          | $32\pm 1$               | -                       |
| $\text{Yb}_{0.4}\text{Gd}_{0.6}(\text{ant})_3$                                      | 40                         | -                          | $41\pm 1$               | -                       |
| $\text{Yb}_{0.5}\text{Gd}_{0.5}(\text{ant})_3$                                      | 50                         | -                          | $52\pm 1$               | -                       |
| $\text{Nd}_{0.1}\text{Gd}_{0.9}(\text{ant})_3$                                      | -                          | 10                         | -                       | $9\pm 1$                |
| $\text{Nd}_{0.2}\text{Gd}_{0.8}(\text{ant})_3$                                      | -                          | 20                         | -                       | $20\pm 1$               |
| $\text{Nd}_{0.3}\text{Gd}_{0.7}(\text{ant})_3$                                      | -                          | 30                         | -                       | $31\pm 1$               |
| $\text{Nd}_{0.4}\text{Gd}_{0.6}(\text{ant})_3$                                      | -                          | 40                         | -                       | $38\pm 1$               |
| $\text{Nd}_{0.5}\text{Gd}_{0.5}(\text{ant})_3$                                      | -                          | 50                         | -                       | $49\pm 1$               |
| $\text{Yb}_{0.1}\text{Gd}_{0.9}(\text{acr})_3(\text{H}_2\text{O})_n$                | 10                         | -                          | $9\pm 1$                | -                       |
| $\text{Yb}_{0.2}\text{Gd}_{0.8}(\text{acr})_3(\text{H}_2\text{O})_n$                | 20                         | -                          | $22\pm 1$               | -                       |
| $\text{Yb}_{0.3}\text{Gd}_{0.7}(\text{acr})_3(\text{H}_2\text{O})_n$                | 30                         | -                          | $31\pm 1$               | -                       |
| $\text{Yb}_{0.4}\text{Gd}_{0.6}(\text{acr})_3(\text{H}_2\text{O})_n$                | 40                         | -                          | $39\pm 1$               | -                       |
| $\text{Yb}_{0.5}\text{Gd}_{0.5}(\text{acr})_3(\text{H}_2\text{O})_n$                | 50                         | -                          | $50\pm 1$               | -                       |
| $\text{Nd}_{0.1}\text{Gd}_{0.9}(\text{acr})_3(\text{H}_2\text{O})_n$                | -                          | 10                         | -                       | $10\pm 1$               |
| $\text{Nd}_{0.2}\text{Gd}_{0.8}(\text{acr})_3(\text{H}_2\text{O})_n$                | -                          | 20                         | -                       | $21\pm 1$               |
| $\text{Nd}_{0.3}\text{Gd}_{0.7}(\text{acr})_3(\text{H}_2\text{O})_n$                | -                          | 30                         | -                       | $30\pm 1$               |
| $\text{Nd}_{0.4}\text{Gd}_{0.6}(\text{acr})_3(\text{H}_2\text{O})_n$                | -                          | 40                         | -                       | $41\pm 1$               |
| $\text{Yb}_{0.1}\text{Nd}_{0.1}\text{Gd}_{0.8}(\text{acr})_3(\text{H}_2\text{O})_n$ | 20                         | 20                         | $20\pm 1$               | $19\pm 1$               |
| $\text{Yb}_{0.02}\text{Nd}_{0.12}\text{Gd}_{0.86}(\text{ant})_3$                    | 2                          | 12                         | $2\pm 1$                | $11\pm 1$               |

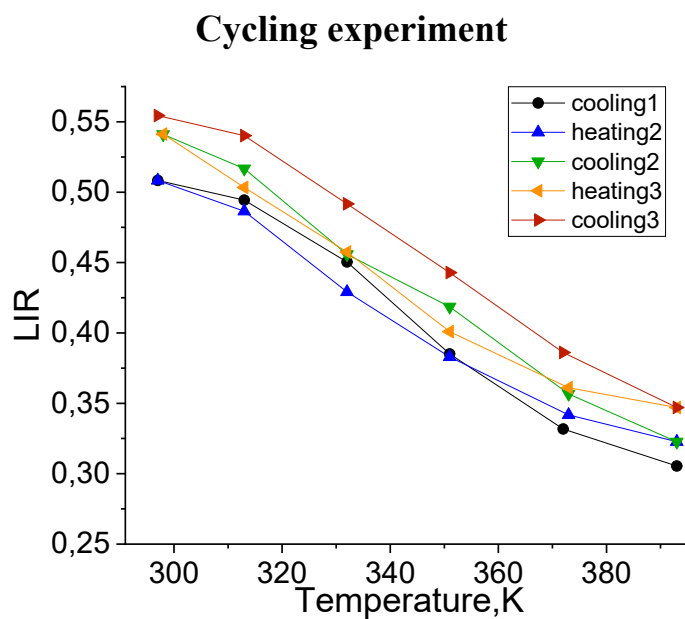

**Figure S7.** LIR of  $\text{Yb}_{0.02}\text{Nd}_{0.12}\text{Gd}_{0.86}(\text{ant})_3$  for series of heating and cooling experiments up to various temperatures

## Thermometric parameters

**Table S2.** Thermometric parameters for  $\text{Yb}_{0.02}\text{Nd}_{0.12}\text{Gd}_{0.86}(\text{ant})_3$  at 77-293 K

| <b><math>\text{Yb}_{0.02}\text{Nd}_{0.12}\text{Gd}_{0.86}(\text{ant})_3</math> at 77-293 K</b> |                                                              |                       |
|------------------------------------------------------------------------------------------------|--------------------------------------------------------------|-----------------------|
| <b>Thermometric parameter</b>                                                                  | <b>Mathematical definition</b>                               | <b>Value</b>          |
| Absolute sensitivity, $S_a$                                                                    | $S_a = \left  \frac{dI}{dT} \right $                         | 0.0055K <sup>-1</sup> |
| Relative sensitivity, $S_r$                                                                    | $S_a = \left  \frac{dI}{dT} \right  * \frac{1}{LIR} * 100\%$ | 0.5%K <sup>-1</sup>   |
| Temperature resolution, $\delta T$                                                             | $\delta I = \frac{1}{S_a}$                                   | 4K                    |

**Table S3.** Thermometric parameters for  $\text{Yb}_{0.1}\text{Nd}_{0.1}\text{Gd}_{0.8}(\text{acr})_3(\text{H}_2\text{O})_n$  at 77-293 K

| <b><math>\text{Yb}_{0.1}\text{Nd}_{0.1}\text{Gd}_{0.8}(\text{acr})_3(\text{H}_2\text{O})_n</math> at 77-293 K</b> |                                                              |                       |
|-------------------------------------------------------------------------------------------------------------------|--------------------------------------------------------------|-----------------------|
| <b>Thermometric parameter</b>                                                                                     | <b>Mathematical definition</b>                               | <b>Value</b>          |
| Absolute sensitivity, $S_a$                                                                                       | $S_a = \left  \frac{dI}{dT} \right $                         | 0.0015K <sup>-1</sup> |
| Relative sensitivity, $S_r$                                                                                       | $S_a = \left  \frac{dI}{dT} \right  * \frac{1}{LIR} * 100\%$ | 0.17%K <sup>-1</sup>  |
| Temperature resolution, $\delta T$                                                                                | $\delta I = \frac{1}{S_a}$                                   | 15K                   |

**Table S4.** Thermometric parameters for  $\text{Yb}_{0.02}\text{Nd}_{0.12}\text{Gd}_{0.86}(\text{ant})_3$  at 293-393 K

| <b><math>\text{Yb}_{0.02}\text{Nd}_{0.12}\text{Gd}_{0.86}(\text{ant})_3</math> at 293-393 K</b> |                                                              |                       |
|-------------------------------------------------------------------------------------------------|--------------------------------------------------------------|-----------------------|
| <b>Thermometric parameter</b>                                                                   | <b>Mathematical definition</b>                               | <b>Value</b>          |
| Absolute sensitivity, $S_a$                                                                     | $S_a = \left  \frac{dI}{dT} \right $                         | 0.0022K <sup>-1</sup> |
| Relative sensitivity, $S_r$                                                                     | $S_a = \left  \frac{dI}{dT} \right  * \frac{1}{LIR} * 100\%$ | 1.8%K <sup>-1</sup>   |
| Temperature resolution, $\delta T$                                                              | $\delta I = \frac{1}{S_a}$                                   | 1.5K                  |

### Approximation of the LIR temperature dependence for $\text{Yb}_{0.02}\text{Nd}_{0.12}\text{Gd}_{0.86}(\text{ant})_3$

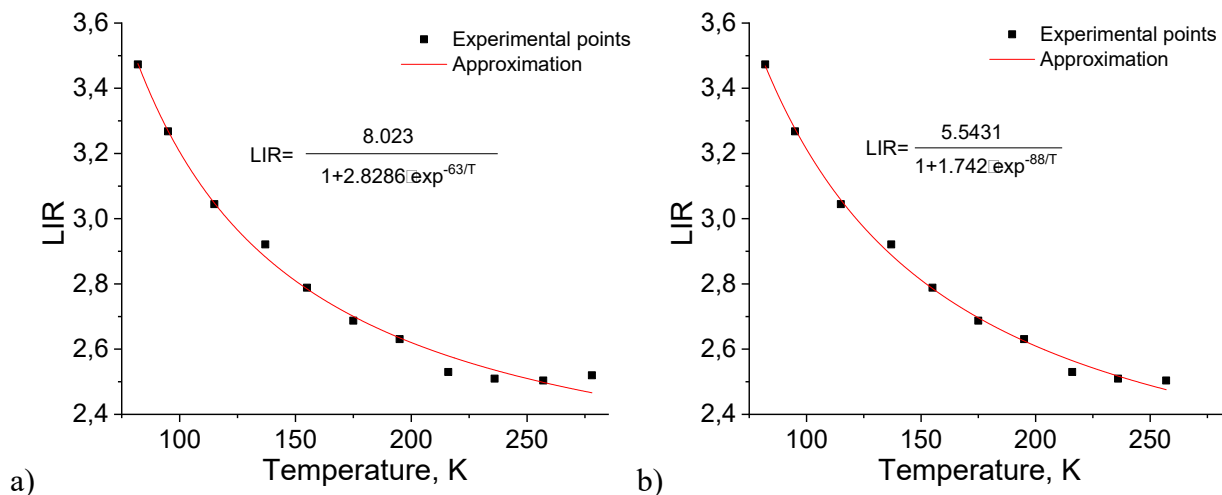

**Figure S8.** Theoretical LIR curve at a) 83-277K and b) 83-257K in approximation of three-level system

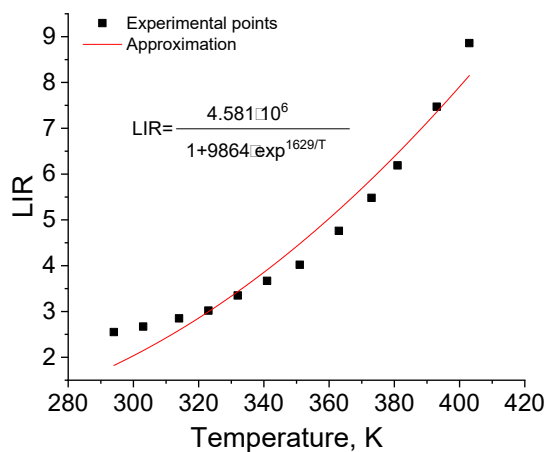

**Figure S9.** Theoretical LIR curve at 293-393K in approximation of three-level system

$$LIR = \frac{B}{1 + A \cdot \exp\left(\frac{E_a}{T}\right)}$$

Table S5. The coefficients of the equation

and  $R^2$  for various temperature ranges

| Temperature range                                        | A                             | B                             | $E_a$             | $R^2$   |
|----------------------------------------------------------|-------------------------------|-------------------------------|-------------------|---------|
| Low temperature range (83-277 K)                         | $8.02 \pm 5.42$               | $2.83 \pm 2.50$               | $63.23 \pm 24.91$ | 0.99307 |
| Low temperature range without last point (83-257 K)      | $5.54 \pm 1.06$               | $1.74 \pm 0.46$               | $87.7 \pm 19.5$   | 0.99659 |
| Low temperature range without last two points (83-237 K) | $4.92 \pm 0.57$               | $1.50 \pm 0.22$               | $104.39 \pm 18.9$ | 0.99752 |
| High temperature range (293-393 K)                       | $5.12 \pm 2.19 \cdot 10^{12}$ | $11\,023 \pm 4.73 \cdot 10^9$ | $-1\,629 \pm 664$ | 0.95405 |

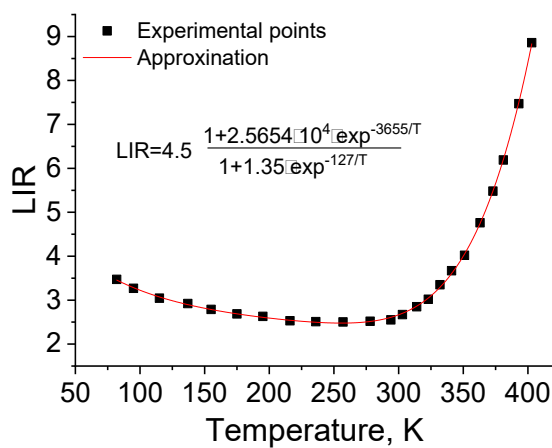

Figure S10. Theoretical LIR curve at 83-393K in approximation of four-level system
